# Supplementary material for: Reinforcing the surface conductivity and stability of primary particles for high-performance Li-rich layered Li1.18Mn0.52Co0.15Ni0.15O2via an integrated strategy
Source: Royal Society of Chemistry journal article supplement (doi:10.1039/d0qi00549e), 2020-01-01
Supplement: d0qi00549e1.pdf [file d0qi00549e1.pdf]

## **Reinforcing the surface conductivity and stability of primary particles for high-performance Li-rich layered $\text{Li}_{1.18}\text{Mn}_{0.52}\text{Co}_{0.15}\text{Ni}_{0.15}\text{O}_2$ via an integrated strategy**

Xianghuan Liu<sup>a,b,c</sup>, Zhenyao Wang<sup>b\*</sup>, Weidong Zhuang<sup>a,b,c,d\*</sup>, Zhao Li<sup>a,b,c</sup>, Wenjin Li<sup>a,b,c</sup>, Liqing Ban<sup>b</sup>, Min Gao<sup>b</sup>, Shigang Lu<sup>a,b,c</sup>

<sup>a</sup>. National Power Battery Innovation Centre, GRINM Group Co., Ltd., Beijing 100088, China.

<sup>b</sup>. China Automotive Battery Research Institute Co., Ltd., Beijing 100088, China.

<sup>c</sup>. General Research Institute for Nonferrous Metals, Beijing 100088, China.

<sup>d</sup>. HDGL Battery Materials Co., Ltd., Beijing 101407, China

E-mail: wdzhuang@126.com (Prof. W. D. Zhuang); wangzy@glabat.com (Dr. Z. Y. Wang)

Table S1. The total average chemical composition of the pristine sample by ICP-AES.

| Sample   | Li    | Mn    | Co    | Ni    |
|----------|-------|-------|-------|-------|
| Pristine | 1.182 | 0.517 | 0.150 | 0.151 |

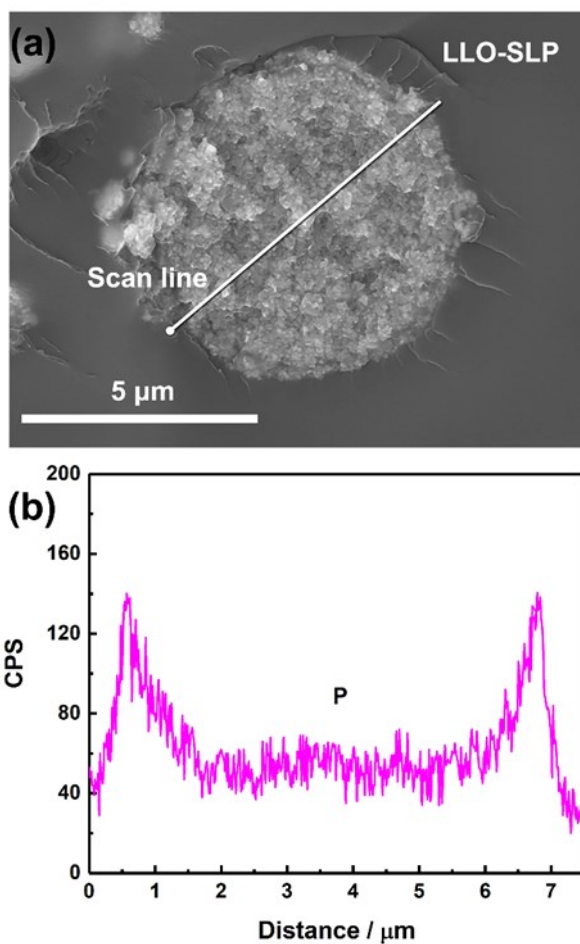

Fig. S1 (a) Cross-section image and (b) EDS line scanning of the LLO-SLP secondary particle

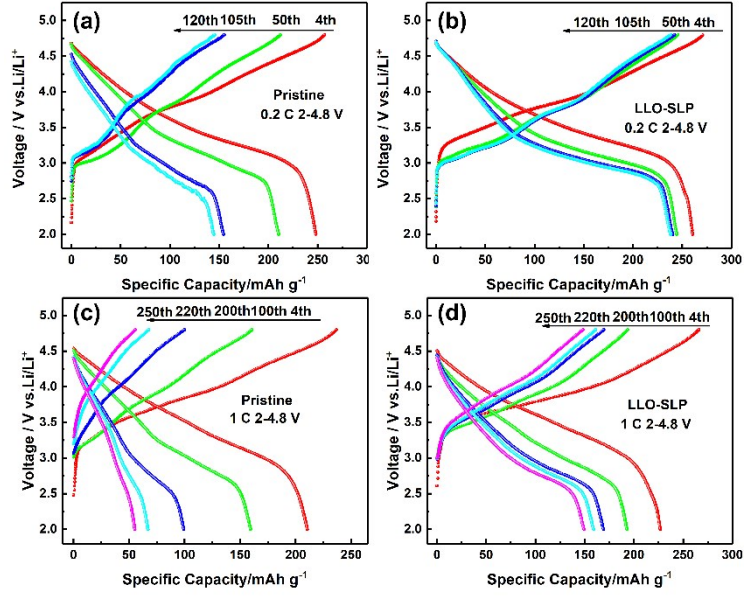

Fig. S2 Charge-discharge profiles of the pristine and LLO-SLP samples at selected cycles (a, b) at 0.2 C rate; (c, d) at 1 C rate

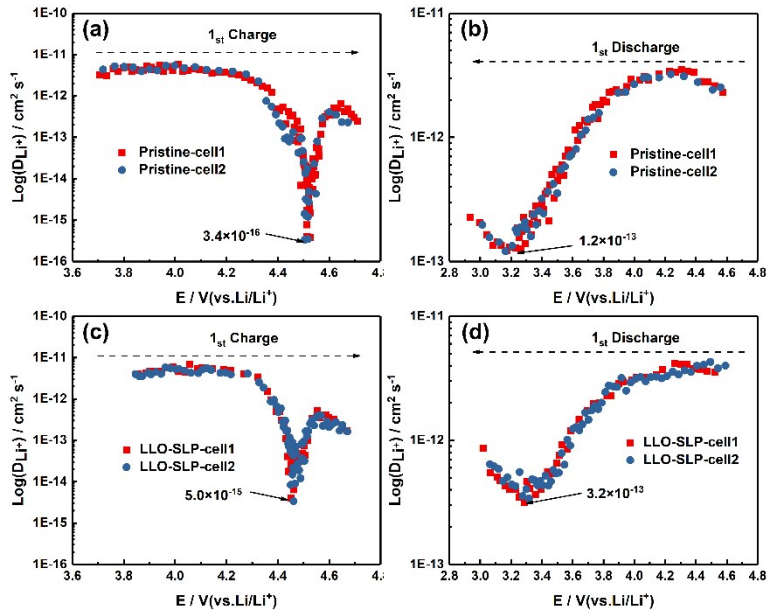

Fig. S3 (a, b) Li<sup>+</sup> diffusion coefficient of the pristine sample during the charge and discharge; (c, d) Li<sup>+</sup> diffusion coefficient of the LLO-SLP sample during the charge and discharge. Two cells were tested on each sample for the GITT test.
